# Supplementary material for: Dual modification of TiO2 nanorod arrays with SiW11Co and Ag nanoparticles for enhanced photocatalytic activity under simulated sunlight
Source: Royal Society of Chemistry journal article supplement (doi:10.1039/c9pp00327d), 2019-10-15
Supplement: c9pp00327d1.pdf [file c9pp00327d1.pdf]

## Supporting Information

### Dual modification of TiO<sub>2</sub> nanorod arrays with SiW<sub>11</sub>Co and Ag nanoparticles for enhanced photocatalytic activity under simulated sunlight

Dandan Yan, Wencheng Fang, Fengyan Li,\* Zhanbin Jin, Lin Xu\*

*Key Laboratory of Polyoxometalate Science of Ministry of Education, Department of Chemistry, Northeast Normal University, Changchun, Jilin 130024, P. R. China. E-mail: lify525@nenu.edu.cn; linxu@nenu.edu.cn; Fax: +86-0431-85099765; Tel: +86-0431-85099765*

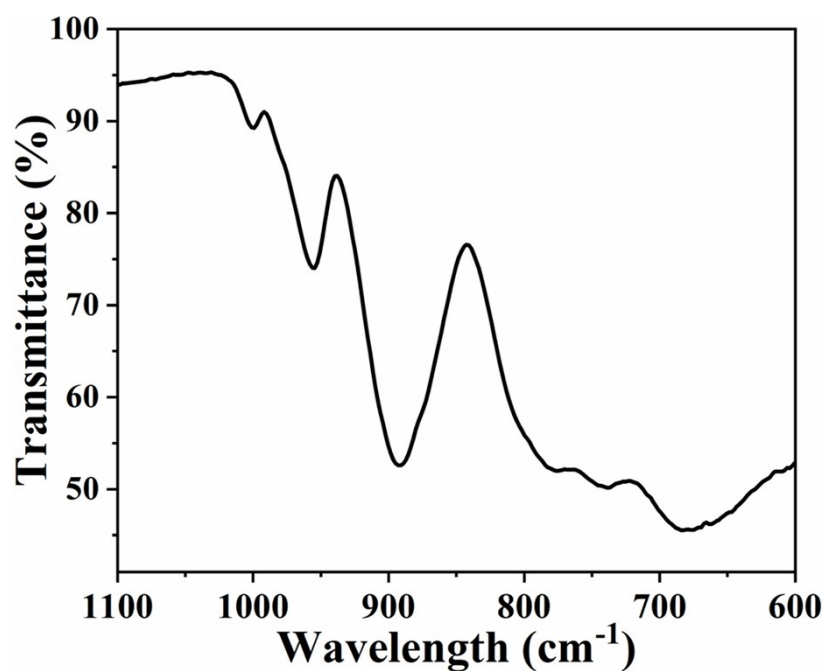

Fig. S1. IR spectrum for SiW<sub>11</sub>Co.

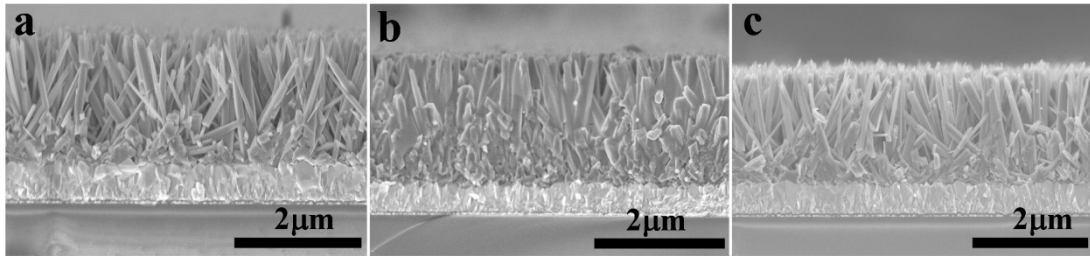

**Fig. S2.** Cross-sectional SEM images of TNRs (a) TNRs/SiW<sub>11</sub>Co (b) and TMRs/SiW<sub>11</sub>Co/Ag (c).

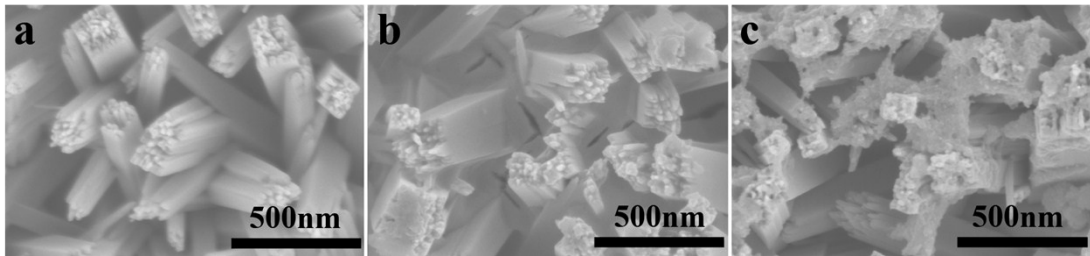

**Fig. S3.** SEM images of TNRs (a) TNRs/SiW<sub>11</sub>Co (b) and TMRs/SiW<sub>11</sub>Co/Ag (c) at high magnification.

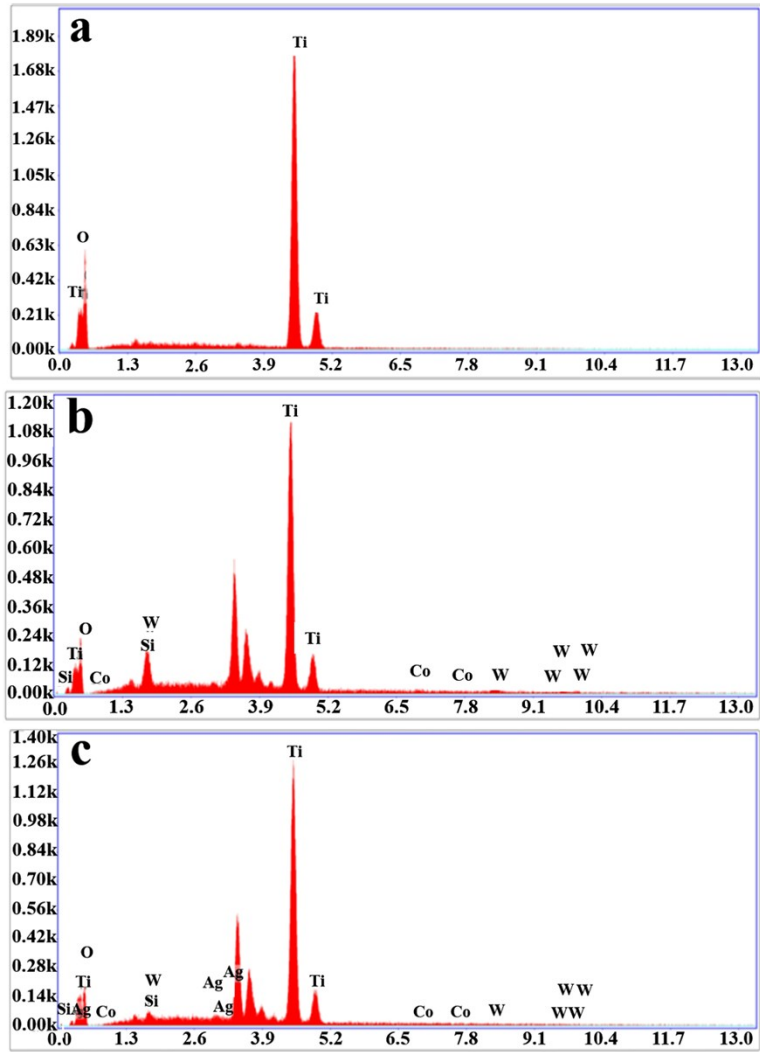

**Fig. S4.** EDS spectrum of (a) TNRs, (b) TNRs/SiW<sub>11</sub>Co, and (c) TNRs/SiW<sub>11</sub>Co/Ag films.

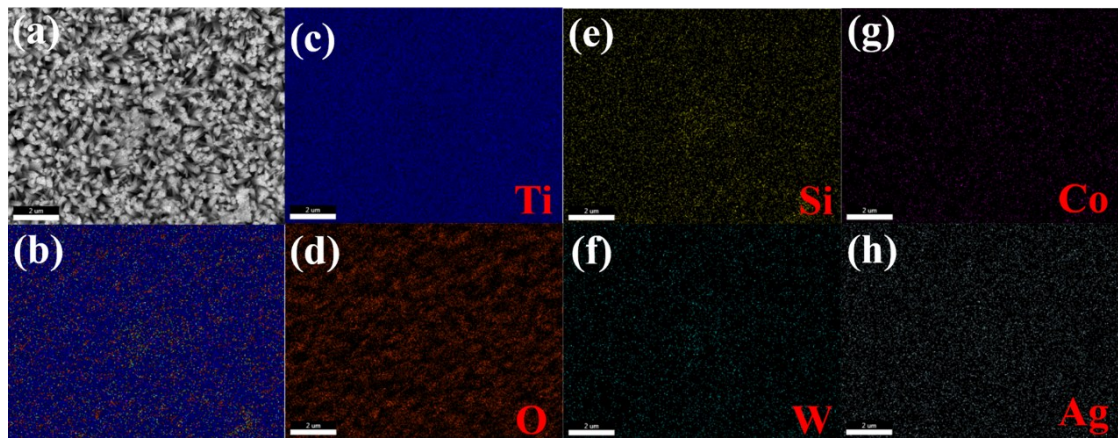

**Fig. S5.** SEM image (a) and the overlay image (b) of TNRs/SiW<sub>11</sub>Co/Ag; the corresponding EDS mapping images of (c) Ti (d) O (e) Si (f) W (g) Co (h) Ag.

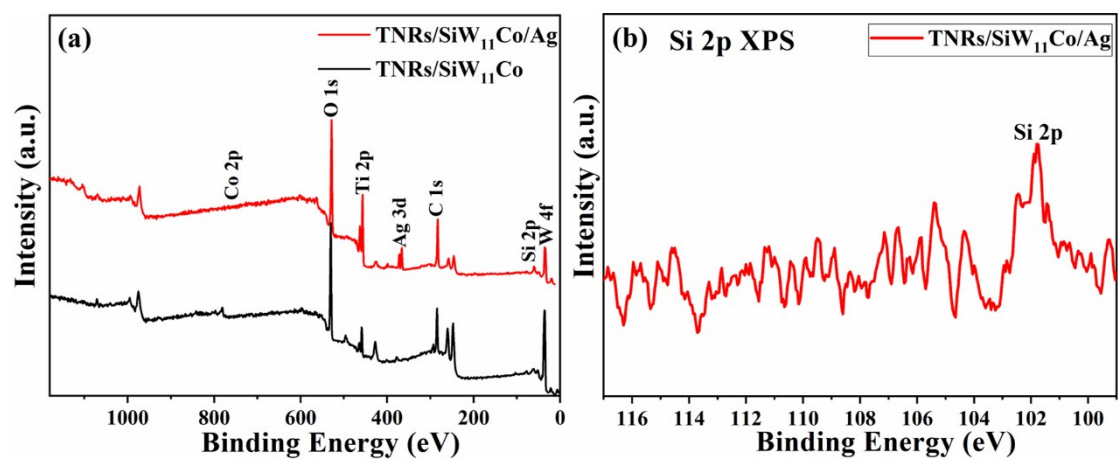

**Fig. S6.** XPS spectra of (a) full survey spectra for TNRs/SiW<sub>11</sub>Co and TNRs/SiW<sub>11</sub>Co/Ag; (b) Si 2p XPS spectra for TNRs/SiW<sub>11</sub>Co/Ag.

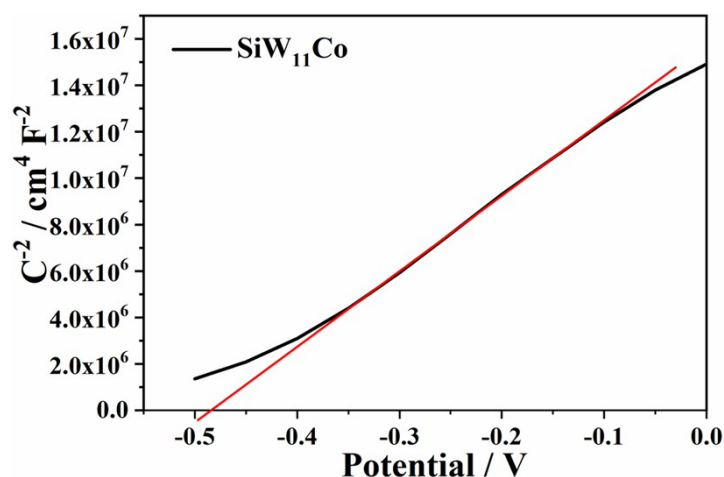

Fig. S7. Mott-Schottky plot of SiW<sub>11</sub>Co.

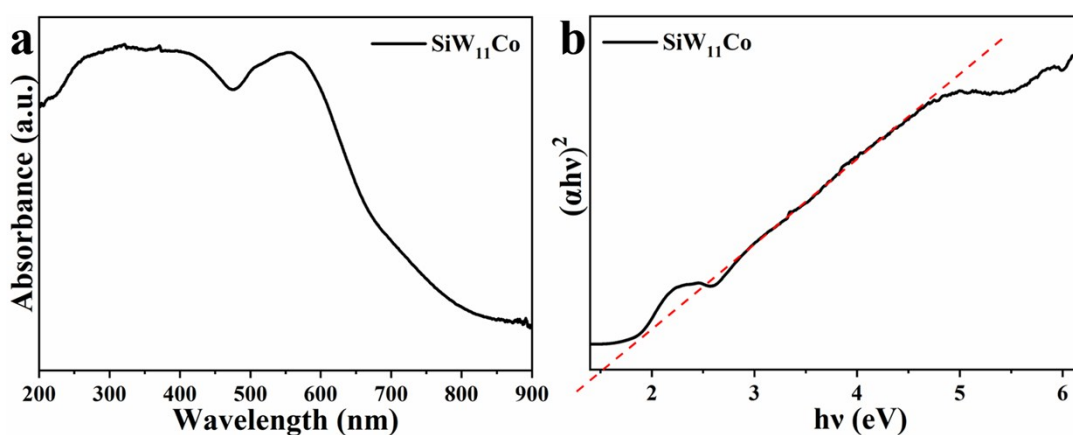

Fig. S8. UV-Vis diffuse reflectance spectra (a) and the band gap determination (b) of SiW<sub>11</sub>Co.

#### The calculation method of CB or VB potentials of SiW<sub>11</sub>Co:

As shown in Fig. S7, it can be proved that SiW<sub>11</sub>Co is a N-type semiconductor due to the slope of Mott-Schottky plot for SiW<sub>11</sub>Co is greater than 0. And the  $E_{CB}$  is calculated by doing the intercept on the horizontal axis. Therefore,  $E_{CB} = -0.481$  V vs. SCE, and  $E_{CB} = 0.24$  V vs. RHE according to  $E_{RHE} = E_{SCE} + 0.241$  (ref. Applied Catalysis A: General 2017, 536, 67.).

From Fig. S8b, the calculated  $E_g$  of SiW<sub>11</sub>Co is 1.52 eV which is calculated by doing the slopes of the tangents on horizontal axis. According to  $E_g = E_{CB} - E_{VB}$ , it can be concluded that  $E_{VB} = +1.28$  V.
